## REFERENCES

1. Shulte-Sasse U, Hess W, Tarnow J: Pulmonary vascular responses to nitrous oxide in patients with normal and high pulmonary vascular resistance. *ANESTHESIOLOGY* 57:9-13, 1982
2. Cox RH: Comparison of mechanical and chemical properties of extra- and intralobar canine pulmonary arteries. *Am J Physiol* 242:H245-H253, 1982
3. Lappas DG, Mortimer VB, Laver MB, Daggett WM, Lowenstein E: Left ventricular performance and pulmonary circulation following addition of nitrous oxide to morphine during coronary artery surgery. *ANESTHESIOLOGY* 43:61-69, 1975
4. Bagshaw RJ, Cox RH: Baroreceptor reflexes and pulmonary hemodynamics during halothane and halothane-nitrous oxide anesthesia in the dog. *Anesth Analg (Cleve)* 60:701-709, 1981

(Accepted for publication July 26, 1982.)

Anesthesiology  
58:206, 1983

## Risk of Air Embolism during Catheter Placement

*To the Editor:*—In a recent clinical report, Westheimer<sup>1</sup> reported a technique for right atrial catheter placement with the use of a wire guide. The technique described seems quite simple and successful. Once the J-wire is inside the catheter, and the catheter is advanced to the correct position in the right atrium, the catheter will be open to room air. This poses the danger of air embolism from the open catheter if the patient suddenly takes a deep breath. The proximal end of the catheter will be difficult to occlude due to the presence of J wire. What precautions are taken to prevent air entry during catheter advancement?

CHARUL MUNSHI, M.D.  
WILLIAM C. ROUMAN, M.D.

Medical College of Wisconsin  
Milwaukee, Wisconsin 53226

## REFERENCE

1. Westheimer DN: Right atrial catheter placement: Use of a wire guide as the intravascular ECG lead. *ANESTHESIOLOGY* 56:478-480, 1982

(Accepted for publication July 26, 1982.)

*In reply:*—Dr. Munshi has questioned whether the patient is at risk of air embolism while using a wire guide for intravascular ECG monitoring during right atrial catheter placement. Air embolism has not occurred with our technique for the following reasons: 1) prior to catheter insertion, the patient is anesthetized, his ventilation is controlled, and he is placed in Trendelenburg's position; and 2) the presence of the wire guide in the catheter effectively seals it and prevents leakage of blood out of the catheter or entrainment of air into it.

D. N. WESTHEIMER, M.D.  
Anesthesiology  
6565 Fannin  
Houston, Texas 77030

(Accepted for publication July 26, 1982.)
